# Supplementary material for: Derivation of New Threshold of Toxicological Concern Values for Exposure via Inhalation for Environmentally-Relevant Chemicals
Source: Front Toxicol. 2020 Oct 16;2:580347. doi: 10.3389/ftox.2020.580347 (PMC8915872; doi:10.3389/ftox.2020.580347)
Supplement: Supplementary file 15 [file Data_Sheet_4.xlsx]

## Sheet: Carthew_2009_Appendix_A_SMILES
INPUT	FOUND_BY	DTXSID	PREFERRED_NAME	SMILES	AVERAGE_MASS	QSAR_READY_SMILES
Benzene alkylate 225	NO_MATCH	-	-	-	-	-
Benzoic acid	Approved Name	DTXSID6020143	Benzoic acid	OC(=O)C1=CC=CC=C1	122.123	OC(=O)C1=CC=CC=C1
1,4-Butanediol	Approved Name	DTXSID2024666	1,4-Butanediol	OCCCCO	90.122	OCCCCO
n-Butyl acetate	Synonym from Valid Source	DTXSID3021982	Butyl acetate	CCCCOC(C)=O	116.16	CCCCOC(C)=O
Isobutyraldehyde	Expert Validated Synonym	DTXSID9021635	2-Methylpropanal	CC(C)C=O	72.107	CC(C)C=O
2-Butoxyethanol	Approved Name	DTXSID1024097	2-Butoxyethanol	CCCCOCCO	118.176	CCCCOCCO
Diethylene glycol butyl ether	Synonym from Valid Source	DTXSID8021519	2-(2-Butoxyethoxy)ethanol	CCCCOCCOCCO	162.229	CCCCOCCOCCO
Diethylene glycol ethyl ether	Synonym from Valid Source	DTXSID2021941	2-(2-Ethoxyethoxy)ethanol	CCOCCOCCO	134.175	CCOCCOCCO
N,N-Dimethylacetamide	Approved Name	DTXSID5020499	N,N-Dimethylacetamide	CN(C)C(C)=O	87.122	CN(C)C(C)=O
Dimethyl Terephthalate	Approved Name	DTXSID0020498	Dimethyl terephthalate	COC(=O)C1=CC=C(C=C1)C(=O)OC	194.186	COC(=O)C1=CC=C(C=C1)C(=O)OC
Ethylene	Approved Name	DTXSID1026378	Ethylene	C=C	28.054	C=C
2-Hexyloxyethanol	Approved Name	DTXSID1026908	2-Hexyloxyethanol	CCCCCCOCCO	146.23	CCCCCCOCCO
Ethylene glycol propyl ether	Synonym from Valid Source	DTXSID1027500	2-Propoxyethanol	CCCOCCO	104.149	CCCOCCO
Ethylacetate	Integrated Source Name	DTXSID1022001	Ethyl acetate	CCOC(C)=O	88.106	CCOC(C)=O
Ethylbenzene	Approved Name	DTXSID3020596	Ethylbenzene	CCC1=CC=CC=C1	106.168	CCC1=CC=CC=C1
2-Ethylhexanol	Expert Validated Synonym	DTXSID5020605	2-Ethyl-1-hexanol	CCCCC(CC)CO	130.231	CCCCC(CC)CO
Glutaraldehyde	Approved Name	DTXSID6025355	Glutaraldehyde	O=CCCCC=O	100.117	O=CCCCC=O
Glycerol	Approved Name	DTXSID9020663	Glycerol	OCC(O)CO	92.094	OCC(O)CO
Hydroxypropyl Acrylate	Approved Name	DTXSID8027878	Hydroxypropyl acrylate	-	130.142	-
Isobutanol	Synonym from Valid Source	DTXSID0021759	2-Methyl-1-propanol	CC(C)CO	74.123	CC(C)CO
Isobutylene	Synonym from Valid Source	DTXSID9020748	Isobutene	CC(C)=C	56.108	CC(C)=C
Isophthalic Acid	Expert Validated Synonym	DTXSID3021485	1,3-Benzenedicarboxylic acid	OC(=O)C1=CC(=CC=C1)C(O)=O	166.132	OC(=O)C1=CC(=CC=C1)C(O)=O
Methanol	Approved Name	DTXSID2021731	Methanol	CO	32.042	CO
3-Methylbutanal	Approved Name	DTXSID1021619	3-Methylbutanal	CC(C)CC=O	86.134	CC(C)CC=O
3-Methyl-2-butenal	Synonym from Valid Source	DTXSID8029606	3-Methylbut-2-enal	CC(C)=CC=O	84.118	CC(C)=CC=O
Methyl methacrylate	Approved Name	DTXSID2020844	Methyl methacrylate	COC(=O)C(C)=C	100.117	COC(=O)C(C)=C
4-Methylpentan-2-ol	Synonym from Valid Source	DTXSID2026781	4-Methyl-2-pentanol	CC(C)CC(C)O	102.177	CC(C)CC(C)O
Methyl isobutyl ketone	Expert Validated Synonym	DTXSID5021889	4-Methyl-2-pentanone	CC(C)CC(C)=O	100.161	CC(C)CC(C)=O
Mineral oils	Synonym from Valid Source	DTXSID3034743	Mineral oil - includes paraffin oil	-	-	-
Pentaerythritol	Approved Name	DTXSID2026943	Pentaerythritol	OCC(CO)(CO)CO	136.147	OCC(CO)(CO)CO
2-Propanol	Expert Validated Synonym	DTXSID7020762	Isopropanol	CC(C)O	60.096	CC(C)O
Propylene	Expert Validated Synonym	DTXSID5021205	1-Propene	CC=C	42.081	CC=C
Propylene glycol	Synonym from Valid Source	DTXSID0021206	1,2-Propylene glycol	CC(O)CO	76.095	CC(O)CO
Polyethyene glycol 200	NO_MATCH	-	-	-	-	-
Terephthalic acid	Approved Name	DTXSID6026080	Terephthalic acid	OC(=O)C1=CC=C(C=C1)C(O)=O	166.132	OC(=O)C1=CC=C(C=C1)C(O)=O
Triethanolamine	Approved Name	DTXSID9021392	Triethanolamine	OCCN(CCO)CCO	149.19	OCCN(CCO)CCO
1,2,3,4-Tetrahydronaphthalene	Synonym from Valid Source	DTXSID1026118	Tetralin	C1CCC2=C(C1)C=CC=C2	132.206	C1CCC2=C(C1)C=CC=C2
Triacetin	Approved Name	DTXSID3026691	Triacetin	CC(=O)OCC(COC(C)=O)OC(C)=O	218.205	CC(=O)OCC(COC(C)=O)OC(C)=O
Benzene Alkylate 215	NO_MATCH	-	-	-	-	-
Methylacrylic acid	Synonym from Valid Source	DTXSID3025542	Methacrylic acid	CC(=C)C(O)=O	86.09	CC(=C)C(O)=O
2-Propen-1-ol	Expert Validated Synonym	DTXSID8020044	Allyl alcohol	OCC=C	58.08	OCC=C
Isophorone	Approved Name	DTXSID8020759	Isophorone	CC1=CC(=O)CC(C)(C)C1	138.21	CC1=CC(=O)CC(C)(C)C1
Acetic anhydride	Approved Name	DTXSID0024395	Acetic anhydride	CC(=O)OC(C)=O	102.089	CC(=O)OC(C)=O
Ammonium persulfate	Synonym from Valid Source	DTXSID9029691	Diammonium peroxydisulfate	[NH4+].[NH4+].[O-]S(=O)(=O)OOS([O-])(=O)=O	228.19	-
2-chlorobenzyl chloride	Approved Name	DTXSID3027241	2-Chlorobenzyl chloride	ClCC1=CC=CC=C1Cl	161.03	ClCC1=CC=CC=C1Cl
Bisphenol A	Approved Name	DTXSID7020182	Bisphenol A	CC(C)(C1=CC=C(O)C=C1)C1=CC=C(O)C=C1	228.291	CC(C)(C1=CC=C(O)C=C1)C1=CC=C(O)C=C1
1,3-dichloro-2-butene	Integrated Source Name	DTXSID7027338	1,3-Dichloro-2-butene	CC(Cl)=CCCl	124.99	CC(Cl)=CCCl
t-Butyl alcohol	Integrated Source Name	DTXSID8020204	tert-Butyl alcohol	CC(C)(C)O	74.123	CC(C)(C)O
N-tert-butylbenzothiazole-2-sulphenamide	Integrated Source Name	DTXSID7026572	N-tert-Butyl-2-benzothiazolesulfenamide	CC(C)(C)NSC1=NC2=C(S1)C=CC=C2	238.37	CC(C)(C)NSC1=NC2=C(S1)C=CC=C2
Caprolactam	Approved Name	DTXSID4020240	Caprolactam	O=C1CCCCCN1	113.16	O=C1CCCCCN1
Caprolactone	Approved Name	DTXSID4027159	Caprolactone	O=C1CCCCCO1	114.144	O=C1CCCCCO1
1-Chloro-1,1-difluoroethane	Approved Name	DTXSID9023960	1-Chloro-1,1-difluoroethane	CC(F)(F)Cl	100.49	CC(F)(F)Cl
3-Chloropropyltrimethoxysilane	Synonym from Valid Source	DTXSID4027490	(3-Chloropropyl)trimethoxysilane	CO[Si](CCCCl)(OC)OC	198.72	CO[Si](CCCCl)(OC)OC
1-Chloro-1,2,2,2-tetrafluoroethane	Expert Validated Synonym	DTXSID7029245	2-Chloro-1,1,1,2-tetrafluoroethane	FC(Cl)C(F)(F)F	136.47	FC(Cl)C(F)(F)F
Chloromethane	Approved Name	DTXSID0021541	Chloromethane	CCl	50.49	CCl
Allyl chloride	Approved Name	DTXSID4039231	Allyl chloride	ClCC=C	76.52	ClCC=C
Decamethylcyclopentasiloxane	Approved Name	DTXSID1027184	Decamethylcyclopentasiloxane	C[Si]1(C)O[Si](C)(C)O[Si](C)(C)O[Si](C)(C)O[Si](C)(C)O1	370.77	C[Si]1(C)O[Si](C)(C)O[Si](C)(C)O[Si](C)(C)O[Si](C)(C)O1
Diacetone Alcohol	Approved Name	DTXSID6024917	Diacetone alcohol	CC(=O)CC(C)(C)O	116.16	CC(=O)CC(C)(C)O
1,1-dichloro-1-fluoroethane	Approved Name	DTXSID2020422	1,1-Dichloro-1-fluoroethane	CC(F)(Cl)Cl	116.94	CC(F)(Cl)Cl
1,2-Dichloro-4-nitrobenzene	Systematic Name	DTXSID8024999	3,4-Dichloronitrobenzene	[O-][N+](=O)C1=CC=C(Cl)C(Cl)=C1	192	[O-][N+](=O)C1=CC=C(Cl)C(Cl)=C1
1,4-Dicyanobutane	Expert Validated Synonym	DTXSID3021936	Hexanedinitrile	N#CCCCCC#N	108.144	N#CCCCCC#N
Dicyclopentadiene	Approved Name	DTXSID5025023	Dicyclopentadiene	C1C=CC2C3CC(C=C3)C12	132.206	C1C=CC2C3CC(C=C3)C12
Diethanolamine	Approved Name	DTXSID3021932	Diethanolamine	OCCNCCO	105.137	OCCNCCO
2,2',2'',2''',2''''-(ethane-1,2-diylnitrilo)pentaacetate	Approved Name	DTXSID80930851	2,2',2'',2''',2''''-(Ethane-1,2-diylnitrilo)pentaacetate	[O-]C(=O)CN(CCN(CC([O-])=O)CC([O-])=O)CCN(CC([O-])=O)CC([O-])=O	388.312	OC(=O)CN(CCN(CC(O)=O)CC(O)=O)CCN(CC(O)=O)CC(O)=O
1,1-Difluoroethane	Approved Name	DTXSID0024050	1,1-Difluoroethane	CC(F)F	66.051	CC(F)F
1,1-Difluoroethylene	Synonym from Valid Source	DTXSID3021439	Vinylidene fluoride	FC(F)=C	64.035	FC(F)=C
N-(1,3-dimethylbutyl)-N'-phenyl-1,4-phenylenediamine	Synonym	DTXSID9025114	N-(1,3-Dimethylbutyl)-N'-phenyl-p-phenylenediamine	CC(C)CC(C)NC1=CC=C(NC2=CC=CC=C2)C=C1	268.404	CC(C)CC(C)NC1=CC=C(NC2=CC=CC=C2)C=C1
Dimethylformamide	Expert Validated Synonym	DTXSID6020515	N,N-Dimethylformamide	CN(C)C=O	73.095	CN(C)C=O
Bis(4-amino-3-methylcyclohexyl)methane	Approved Name	DTXSID6029670	Bis(4-amino-3-methylcyclohexyl)methane	CC1CC(CC2CCC(N)C(C)C2)CCC1N	238.419	CC1CC(CC2CCC(N)C(C)C2)CCC1N
Dipropylene Glycol Methyl Ether	Expert Validated Synonym	DTXSID0027983	Dipropylene glycol monomethyl ether	-	148.2	-
5-Ethylidene-2-norbornene	Approved Name	DTXSID1025306	5-Ethylidene-2-norbornene	CC=C1CC2CC1C=C2	120.195	CC=C1CC2CC1C=C2
Tetrahydrofurfuryl alcohol	Approved Name	DTXSID1029128	Tetrahydrofurfuryl alcohol	OCC1CCCO1	102.133	OCC1CCCO1
Hexamethyldisiloxane	Approved Name	DTXSID4026769	Hexamethyldisiloxane	C[Si](C)(C)O[Si](C)(C)C	162.379	C[Si](C)(C)O[Si](C)(C)C
Hexamethylenediamine	Expert Validated Synonym	DTXSID5024922	1,6-Hexanediamine	NCCCCCCN	116.208	NCCCCCCN
Hydrogen chloride	Synonym from Valid Source	DTXSID2020711	Hydrochloric acid	Cl	36.46	-
Hydrogen peroxide	Approved Name	DTXSID2020715	Hydrogen peroxide	OO	34.014	-
3-Methoxy-3-methyl-1-butanol	Synonym	DTXSID8044389	3-Methoxy-3-methylbutan-1-ol	COC(C)(C)CCO	118.176	COC(C)(C)CCO
Propylene glycol monomethyl ether	Approved Name	DTXSID10872972	Propylene glycol monomethyl ether	-	90.121	-
Methylacrylonitrile	Synonym from Valid Source	DTXSID1024176	Methacrylonitrile	CC(=C)C#N	67.091	CC(=C)C#N
Methyl bromide	Approved Name	DTXSID8020832	Methyl bromide	CBr	94.939	CBr
2-nitroaniline	Approved Name	DTXSID1025726	2-Nitroaniline	NC1=CC=CC=C1[N+]([O-])=O	138.126	NC1=CC=CC=C1[N+]([O-])=O
Octamethylcyclotetrasiloxane	Approved Name	DTXSID7027205	Octamethylcyclotetrasiloxane	C[Si]1(C)O[Si](C)(C)O[Si](C)(C)O[Si](C)(C)O1	296.616	C[Si]1(C)O[Si](C)(C)O[Si](C)(C)O[Si](C)(C)O1
2,4-Pentanedione	Approved Name	DTXSID4021979	2,4-Pentanedione	CC(=O)CC(C)=O	100.117	CC(=O)CC(C)=O
1,1,1,2,2-Pentafluoroethane	Synonym from Valid Source	DTXSID1024251	Pentafluoroethane	FC(F)C(F)(F)F	120.022	FC(F)C(F)(F)F
Permethrin	Approved Name	DTXSID8022292	Permethrin	CC1(C)C(C=C(Cl)Cl)C1C(=O)OCC1=CC(OC2=CC=CC=C2)=CC=C1	391.29	CC1(C)C(C=C(Cl)Cl)C1C(=O)OCC1=CC(OC2=CC=CC=C2)=CC=C1
Phosphorus trichloride	Synonym from Valid Source	DTXSID5029687	Phosphorous trichloride	ClP(Cl)Cl	137.32	-
1,2-dichloropropane	Approved Name	DTXSID0020448	1,2-Dichloropropane	CC(Cl)CCl	112.98	CC(Cl)CCl
Silica	Approved Name	DTXSID1029677	Silica	-	-	-
Sulphuric acid	Synonym from Valid Source	DTXSID5029683	Sulfuric acid	OS(O)(=O)=O	98.07	-
1,1,2-Trichloroethane	Approved Name	DTXSID5021380	1,1,2-Trichloroethane	ClCC(Cl)Cl	133.4	ClCC(Cl)Cl
Trimellitic Acid	Expert Validated Synonym	DTXSID3021487	1,2,4-Benzenetricarboxylic acid	OC(=O)C1=CC(C(O)=O)=C(C=C1)C(O)=O	210.141	OC(=O)C1=CC(C(O)=O)=C(C=C1)C(O)=O
N-vinyl-2-pyrrolidone	Approved Name	DTXSID2021440	N-Vinyl-2-pyrrolidone	C=CN1CCCC1=O	111.144	C=CN1CCCC1=O
